# Supplementary material
Source: PubMed Central journal article supplement (PMC5330718)
Supplement: jci-127-89455-s001.pdf [file jci-127-89455-s001.pdf]

# Supplementary Figure 1

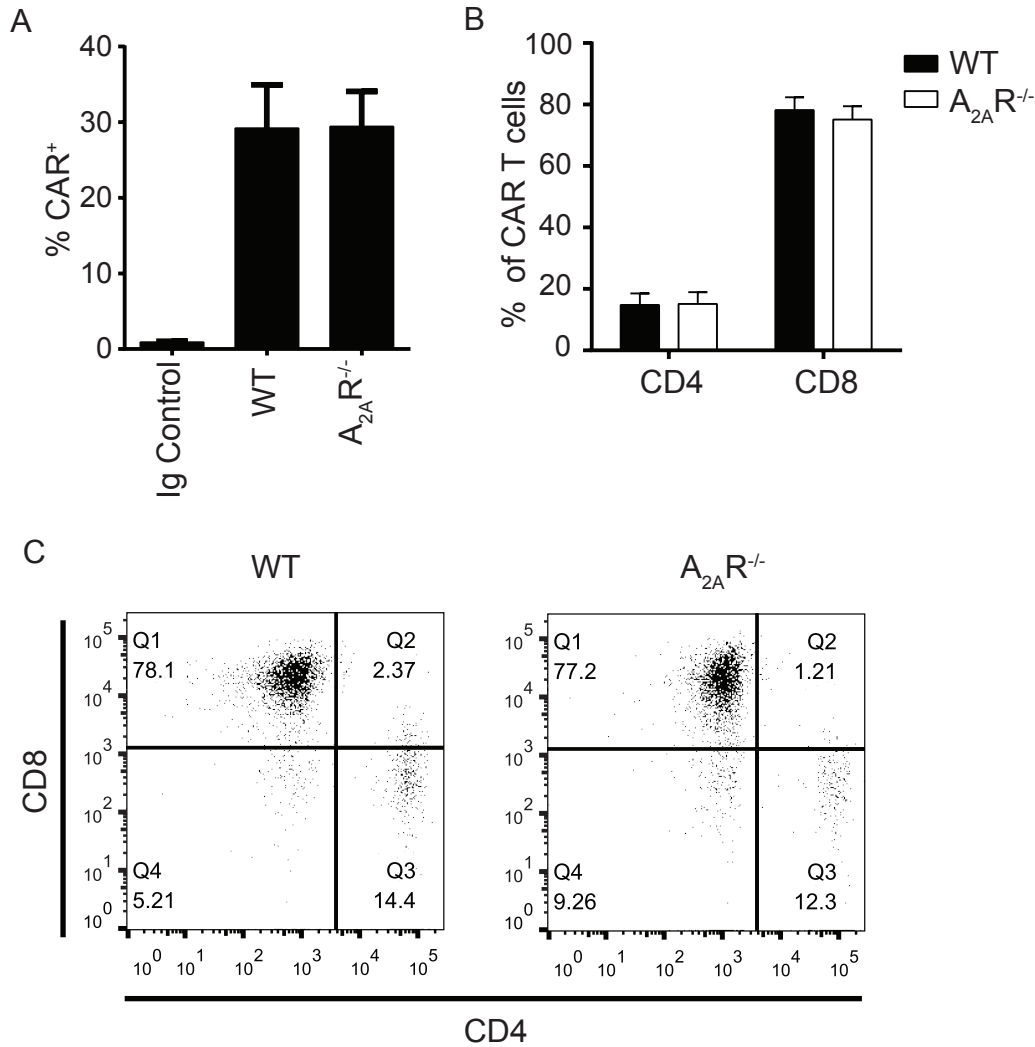

## Supplementary Figure 1. Expression of the anti-Her2 CAR on WT and A<sub>2A</sub>R<sup>-/-</sup> CAR T cells

Expression of the anti-Her2 CAR was determined by flow cytometry at day 7 post transduction. (A) Expression of the CAR on transduced T cells derived from WT and A<sub>2A</sub>R<sup>-/-</sup> mice (B-C) Proportion of CD4<sup>+</sup> and CD8<sup>+</sup> T cells. (A-B) Data represented as the mean ± SEM of 8 individual experiments. (C) Data from a representative experiment.

## Supplementary Figure 2

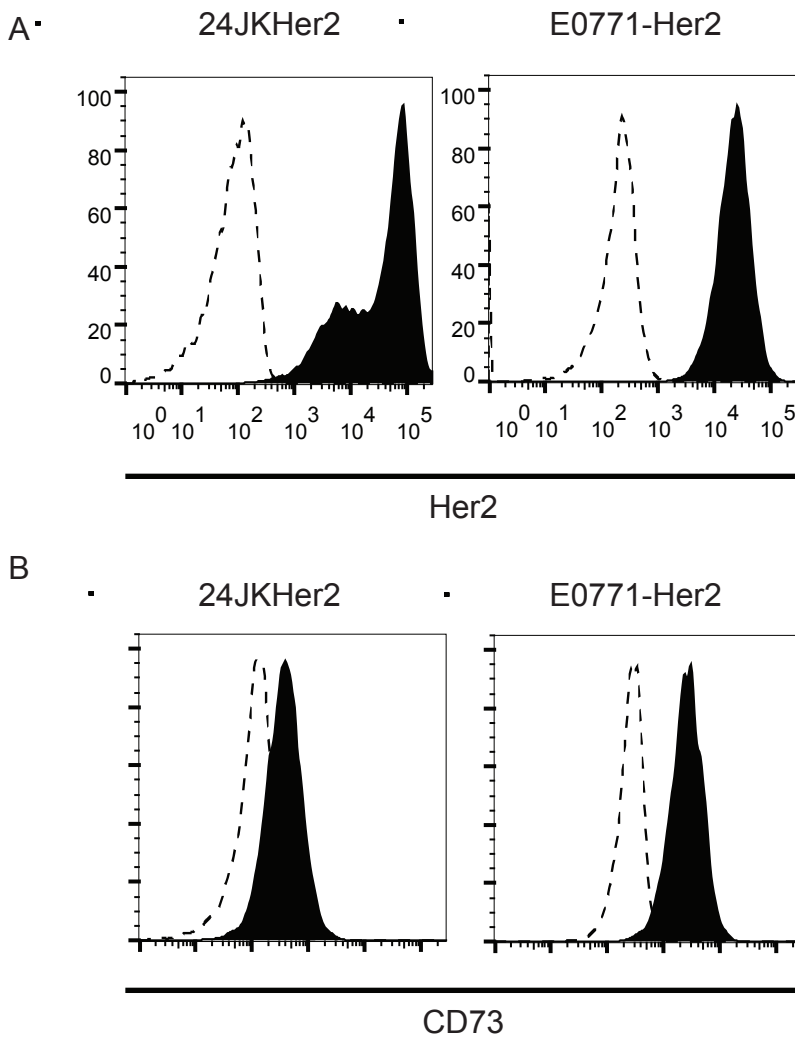

### Supplementary Figure 2. Expression of Her2 and CD73 on murine tumor lines

The expression of Her2 (**A**) and CD73 (**B**) on 24JK-Her2 and E0771-Her2 was determined by flow cytometry. Dashed line indicates the staining with an isotype control antibody.

# Supplementary Figure 3

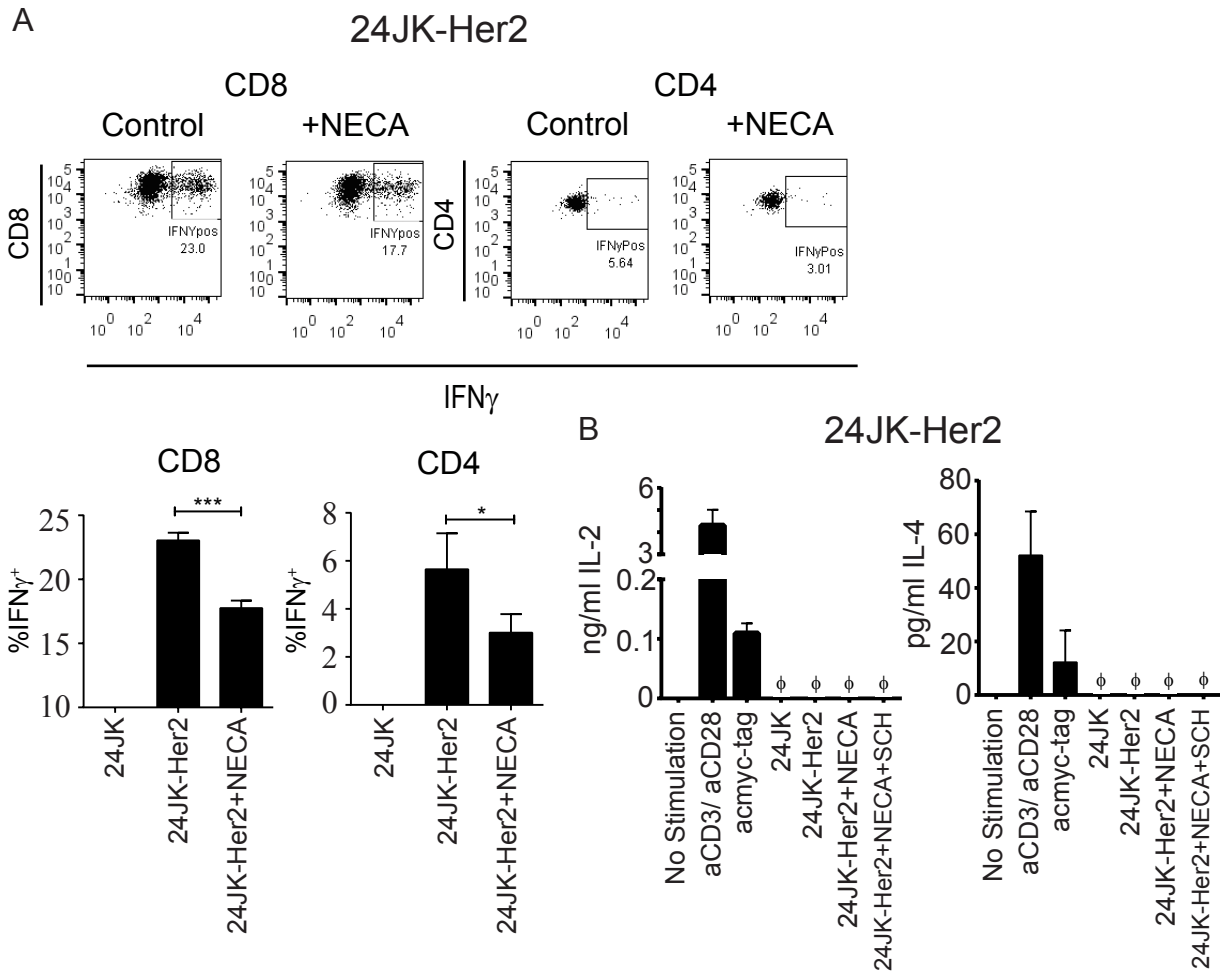

## Supplementary Figure 3. Cytokine production of anti-Her2 CAR T cells cocultured with 24JK-Her2 tumor cells.

$2 \times 10^5$  CAR T cells were cocultured with  $1 \times 10^5$  24JK/ 24JK-Her2 tumor cells in the presence or absence of NECA (1  $\mu$ M) or SCH58261 (1  $\mu$ M). Following overnight coculture Golgi Plug and Golgi Stop were added for a further 4 hours of coculture and IFN $\gamma$  production was determined by intracellular staining (**A**) or supernatants were harvested and the production of IL-2 and IL-4 determined by cytometric bead array (**B**). For a positive control, some anti-Her-2 CAR T cells were stimulated with  $\alpha$ CD3/  $\alpha$ CD28 or  $\alpha$ -myc-tag ( $\alpha$ CAR stimulation). Results shown are the mean  $\pm$  SD of triplicate cultures from a representative experiment of  $n=3$ . \*\*\* $p < 0.001$ , \* $p < 0.05$  by paired t test,  $\Phi$  indicates that level of cytokine was below the limit of detection.

## Supplementary Figure 4

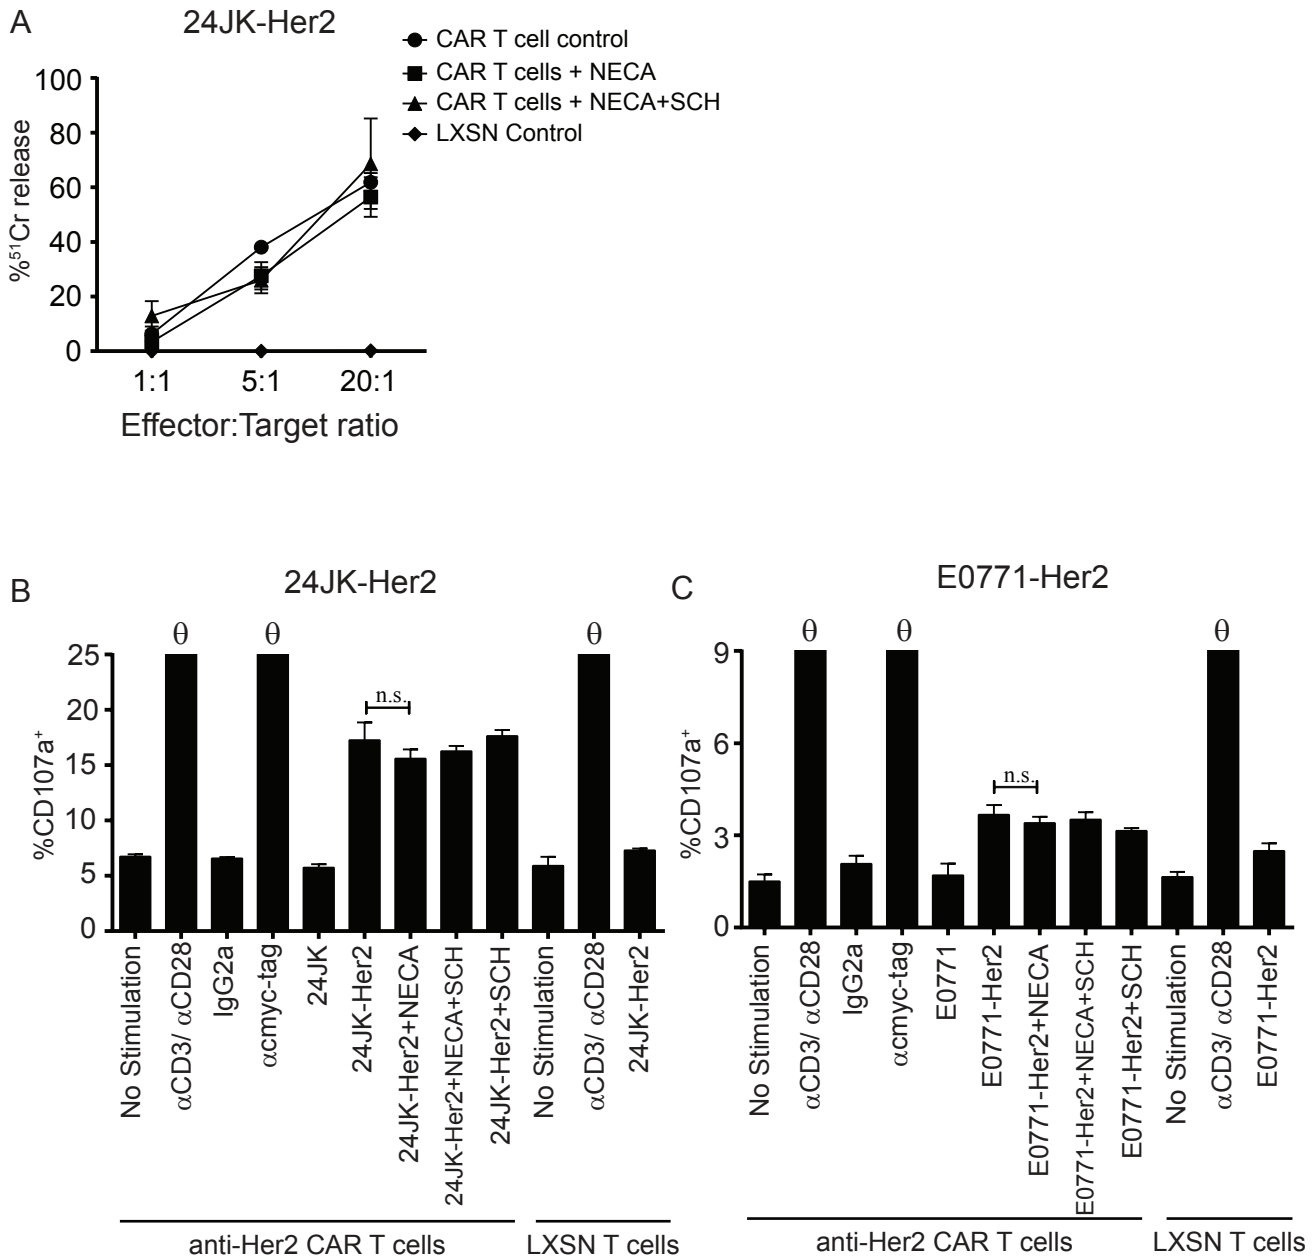

### Supplementary Figure 4. A<sub>2A</sub>R activation does not suppress *in vitro* cytotoxicity of CAR T cells

(A)  $1 \times 10^4$  24JK-Her2 tumor cells were labelled with  $^{51}\text{Cr}$  and cocultured with the indicated number of CAR T cells for 4 hours. (B-C)  $2 \times 10^5$  CAR T cells were cocultured with  $1 \times 10^5$  24JK/ 24JK-Her2 tumor cells for 16 hours. Anti-CD107a, Golgi Plug and Golgi Stop were added for the last 4 hours of coculture. Cocultures were performed in the presence or absence of NECA (1  $\mu\text{M}$ ) and SCH58261 (1  $\mu\text{M}$ ). (A-C) Data is from a representative experiment of  $n=4$  and is shown as the mean  $\pm$  SD of triplicates. LXSN T cells refers to T cells transduced with the empty retroviral vector (LXSN) control. n.s. not significant by one way ANOVA.  $\theta$ - indicates that the recorded value was above the maximum indicated on the graph.

## Supplementary Figure 5

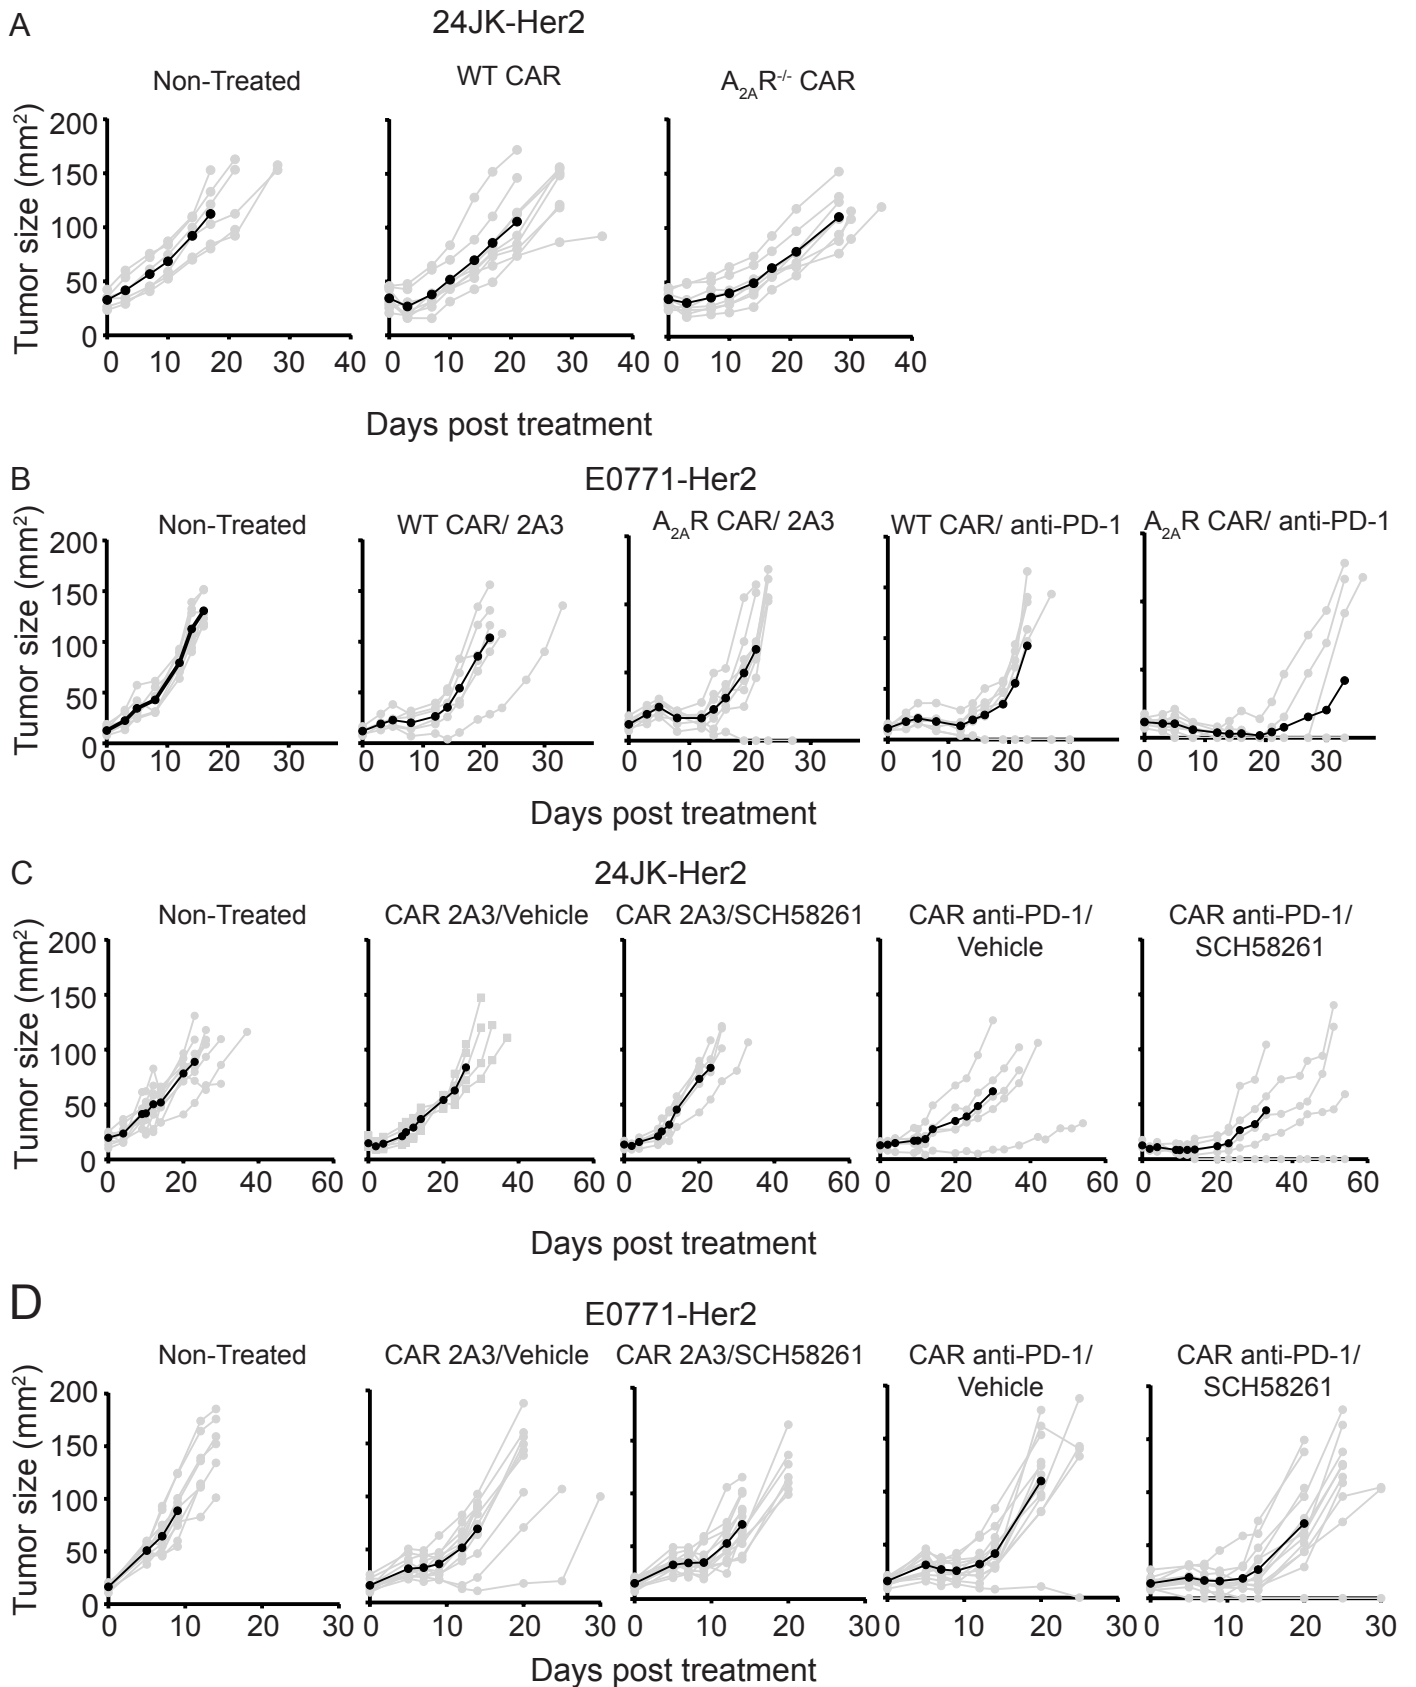

### Supplementary Figure 5. Combined targeting of $A_{2A}R$ and PD-1 leads to greater control of long term tumor growth by anti-Her2 CAR T cells

Long-term tumor growth is shown for mice injected with either 24JK-Her2 (A,C) or E0771-Her2 (B,D) and treated as per **Figure 2** (A,B) or **Figure 3** (C,D). Individual long-term tumor growth curves are shown for each mice presented in **Figures 2** and **3** (grey) with the mean tumor size of each group indicated by the black line.

## Supplementary Figure 6

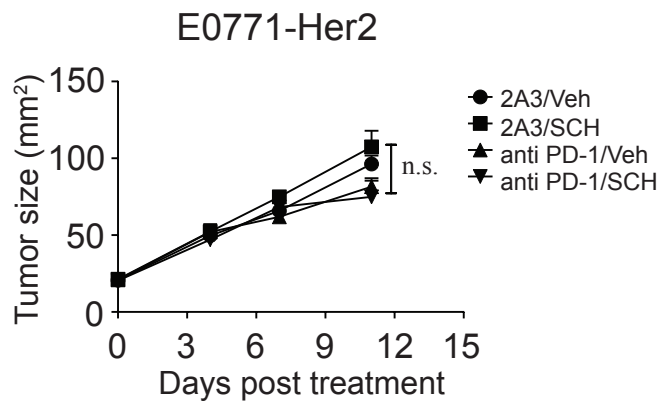

### Supplementary Figure 6. PD-1 and A<sub>2A</sub>R blockade is ineffective in controlling the growth of E0771-Her2 tumors in the absence of CAR T cells

C57/BL6-Her2 mice were injected with  $1 \times 10^5$  E0771-Her2 tumor cells. Mice underwent total body irradiation (5 Gy) on day 7 and then treated with 2A3 isotype control or anti PD-1 (200  $\mu$ g/ mouse) on days 0, 4 and 8 post irradiation. Mice were also treated daily with either 1 mg/ kg SCH58261 or vehicle control. Data is presented as the mean  $\pm$  SEM of 6 mice from a representative experiment. n.s. not significant by two way ANOVA.

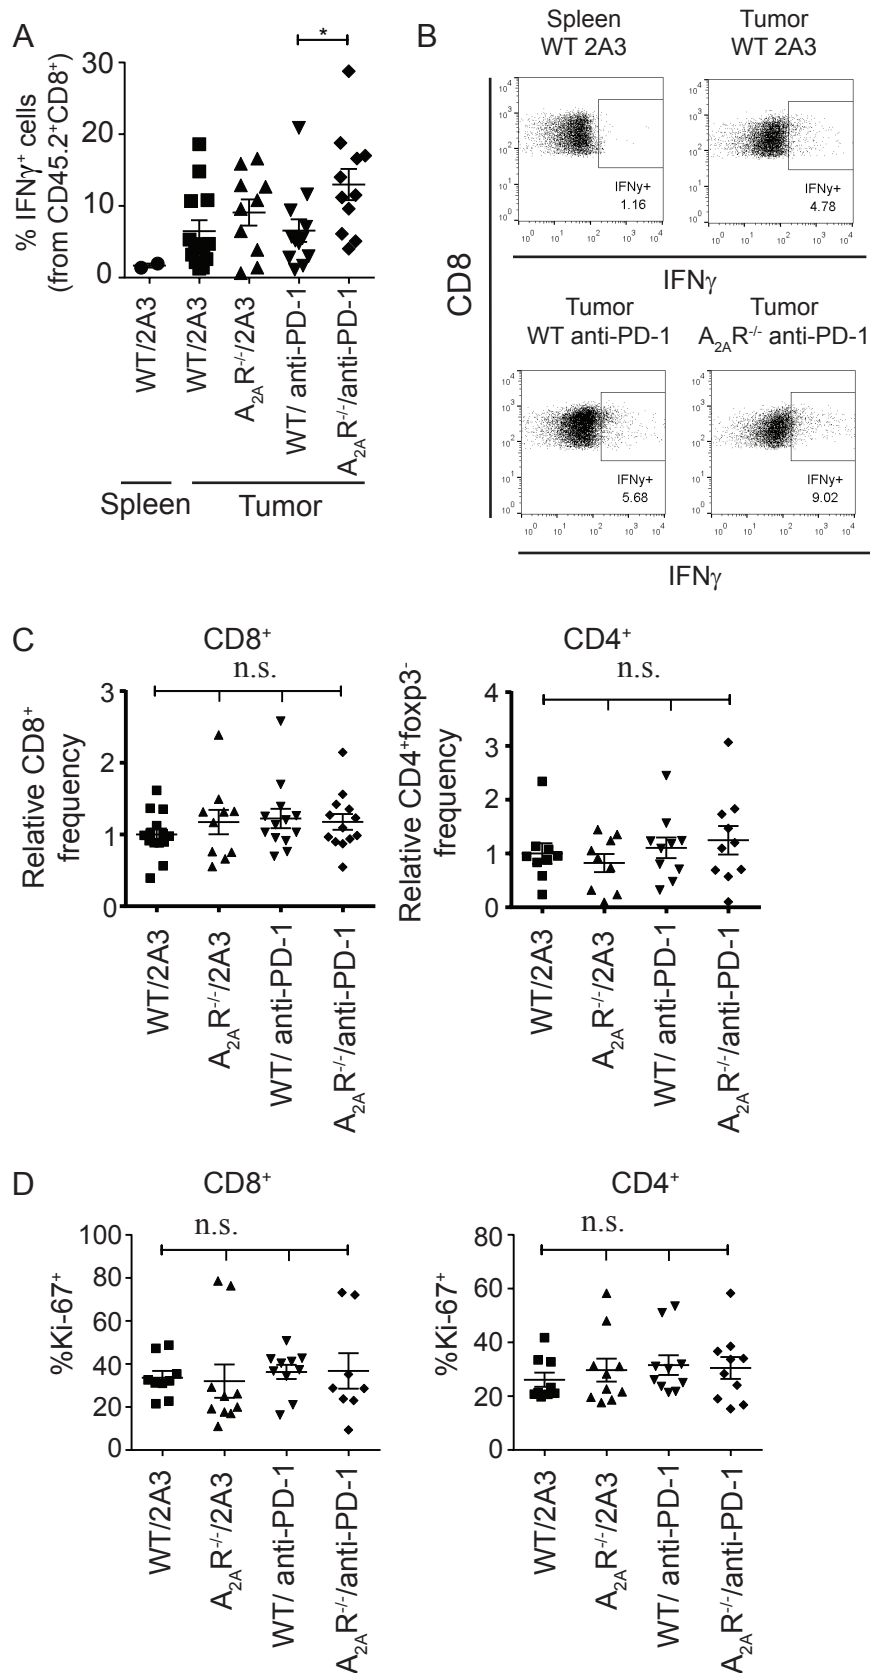

### Supplementary Figure 7. Phenotype of WT and $A_{2A}R^{-/-}$ tumor-infiltrating CAR T cells following PD-1 blockade

C57/BL6-Her2 mice were injected with  $1 \times 10^5$  E0771-Her2 tumor cells and treated as per **Figure 3**. On Day 6 post treatment tumor-infiltrating lymphocytes were analysed by FACS. **(A-B)** Proportion of  $CD3^+CD8^+$  cells that were  $IFN\gamma^+$ . **(A)** Data is shown as the mean  $\pm$  SEM of at least 10 mice **(B)** Representative FACS plots. **(C)** Relative frequency of  $CD3^+CD8^+$  and  $CD3^+CD4^+$  T Cells from the viable  $CD45^+$  gate. **(D)** Proportion of  $CD8^+$  or  $CD4^+$  cells expressing Ki-67. Data is shown as the mean  $\pm$  SEM for at least 9 mice. \* $p < 0.05$ , n.s. not significant by one way ANOVA.

## Supplementary Figure 8

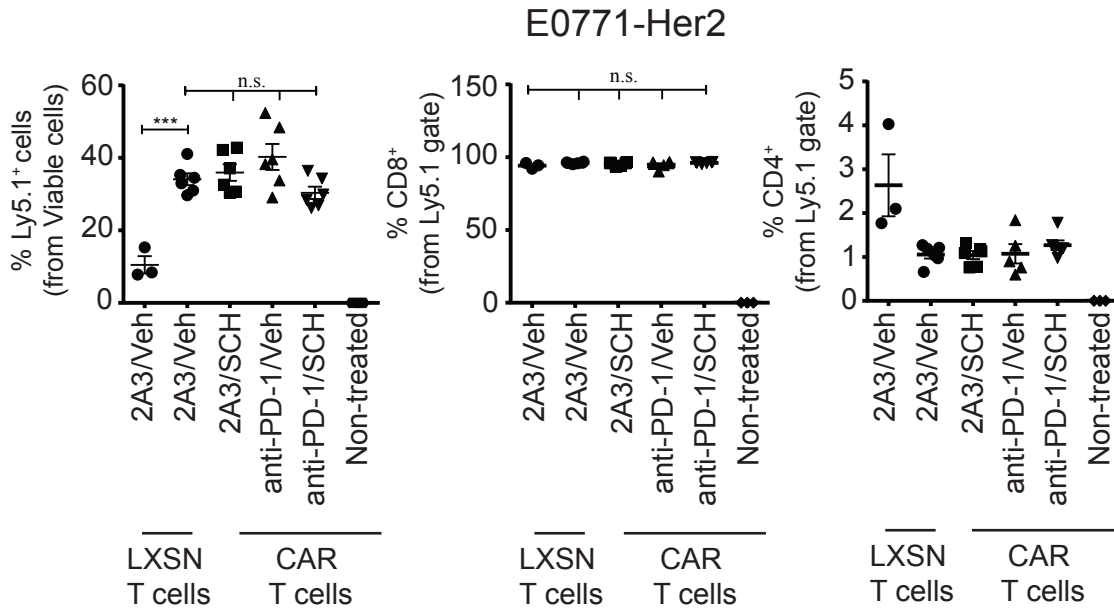

### Supplementary Figure 8. Phenotype of tumor-infiltrating CAR T cells following treatment with anti-Her 2 CAR T cells and PD-1/ A<sub>2A</sub>R blockade

C57/BL6-Her2 mice were injected with  $1 \times 10^5$  E0771-Her2 tumor cells. Mice were treated as per **Figure 3** using CAR T cells derived from Ly5.1<sup>+</sup> splenocytes. On Day 9 post treatment the frequency of Ly5.1<sup>+</sup>, Ly5.1<sup>+</sup>CD8<sup>+</sup> and Ly5.1<sup>+</sup>CD4<sup>+</sup> cells was determined. Data is shown as the mean  $\pm$  SEM for at least 3 mice from a representative experiment of  $n = 3$ . LXSN T cells refers to T cells transduced with the empty retroviral vector (LXSN) control.  $P < 0.001$ , n.s. not significant by one way ANOVA.



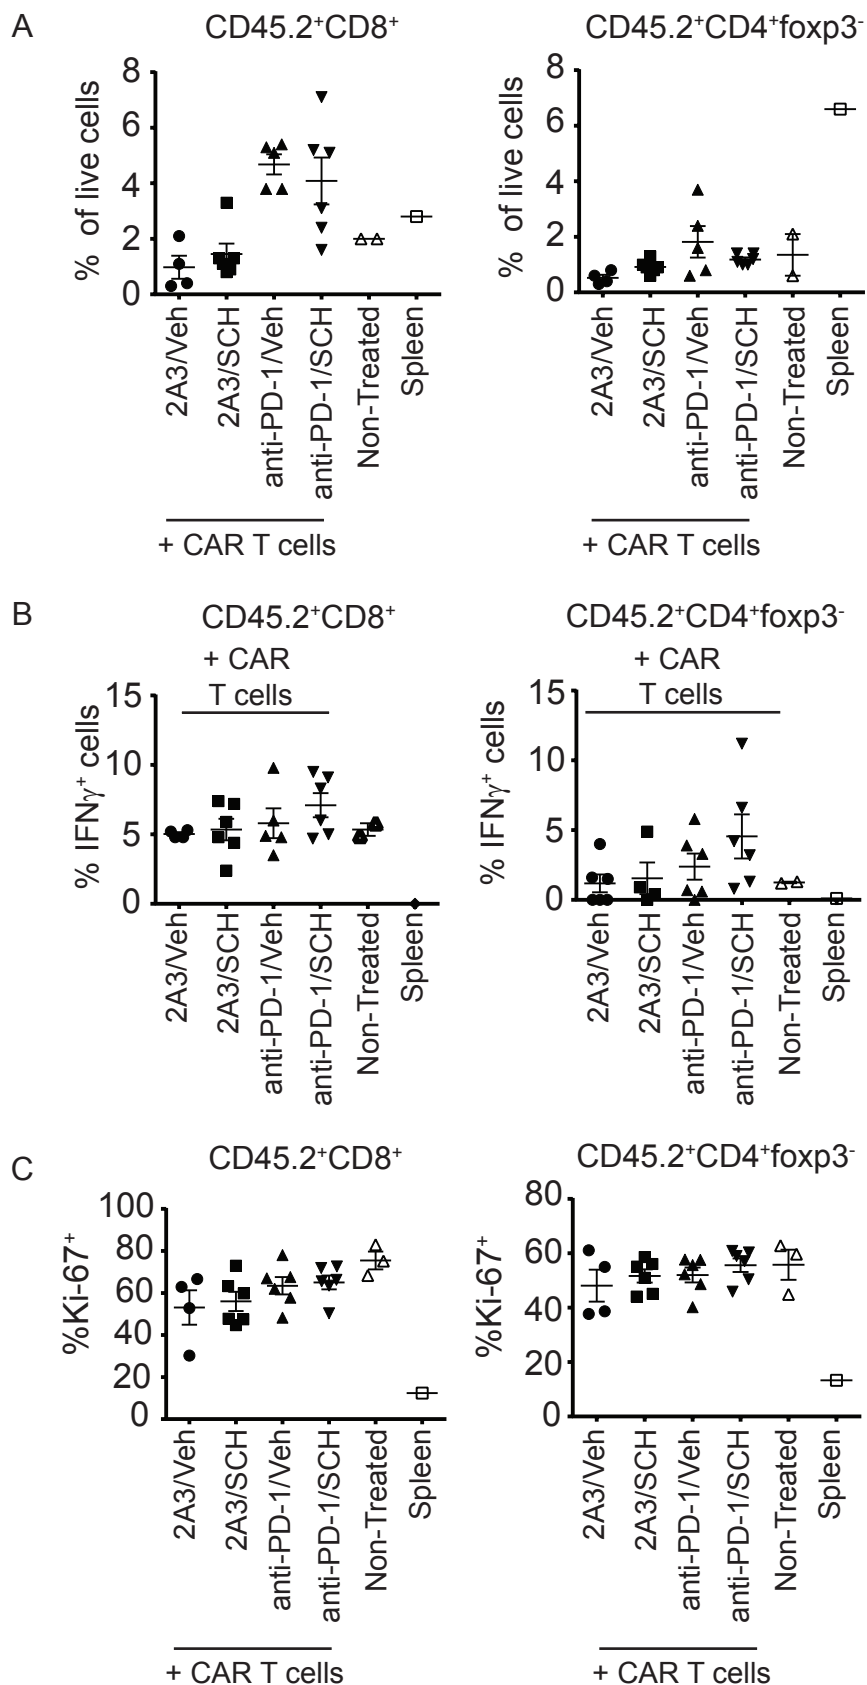

**Supplementary Figure 9. Phenotype of tumor-infiltrating endogenous T cells following treatment with anti-Her 2 CAR T cells and PD-1/ A<sub>2A</sub>R blockade**

C57/BL6-Her2 mice were injected with  $1 \times 10^5$  E0771-Her2 tumor cells. Mice were treated as per **Figure 3** using CAR T cells derived from Ly5.1<sup>+</sup> splenocytes. On Day 9 post treatment the frequency (A) IFN $\gamma$  production (B) and expression of KI-67 (C) on tumor infiltrating endogenous CD45.2<sup>+</sup>CD8<sup>+</sup> or CD45.2<sup>+</sup>CD4<sup>+</sup>foxp3<sup>-</sup> cells was determined. Data is shown as the mean  $\pm$  SEM for at least 3 mice from a representative experiment. '+ CAR T cells' indicates analysis of endogenous T cells in mice treated with anti-HER2 CAR T cells and the indicated therapies.

## Supplementary Figure 10

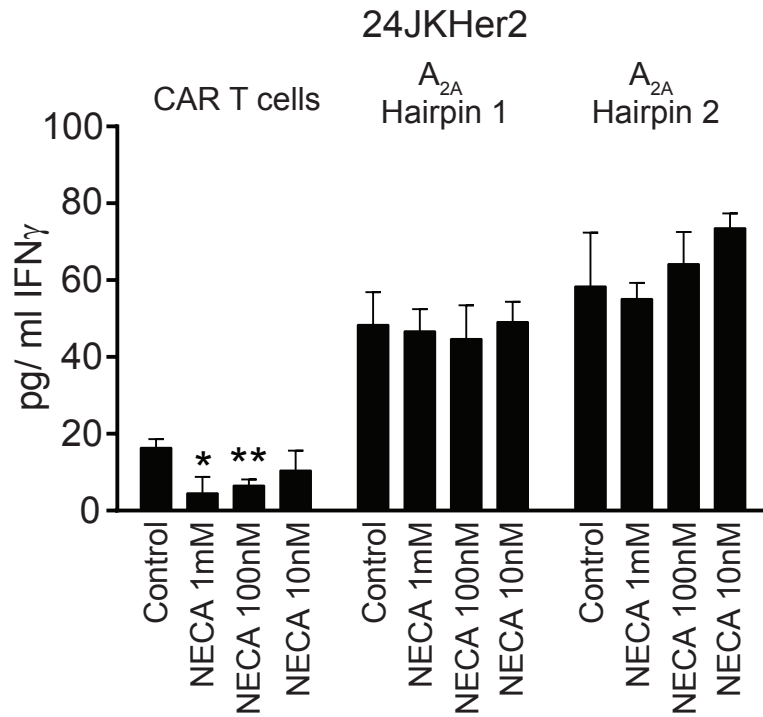

### Supplementary Figure 10. Targeting the A<sub>2A</sub>R with shRNA retroviral technology enhances CAR T cell IFN $\gamma$ production

CAR T cells were transduced with retroviruses encoding A<sub>2A</sub>R-directed shRNA or scrambled shRNA control and then selected with 2  $\mu$ g/ml puromycin from day 4-6. Eight days post activation CAR T cells were then assessed for function.  $1 \times 10^5$  CAR T cells were cocultured with 24JK/ 24JK-Her2 tumor cells at a 1:1 ratio in the presence or absence of NECA at indicated concentrations. Supernatants were collected after 16 hours and analysed for concentration of IFN $\gamma$ . Data is the mean  $\pm$  SD of quadruplicates from a representative experiment of n=2. \* p<0.05, \*\*p<0.01 by one way ANOVA.

# Supplementary Figure 11

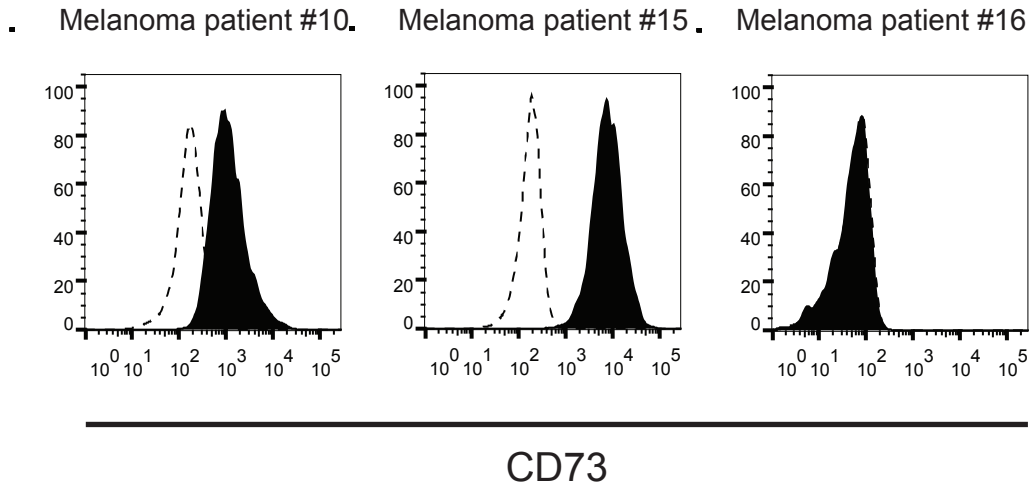

**Supplementary Figure 11. Expression of CD73 on patient derived melanomas.**

The expression of CD73 on patient-derived melanomas was determined by flow cytometry. Dashed line indicates the staining with an isotype control antibody.
